# Supplementary material for: Blepharostoma trichophyllum S.L. (Marchantiophyta): The Complex of Sibling Species and Hybrids
Source: MDPI journal article supplement (doi:10.3390/plants9111423), 2020-10-23
Supplement: s1 [file s1]

Supplementary material

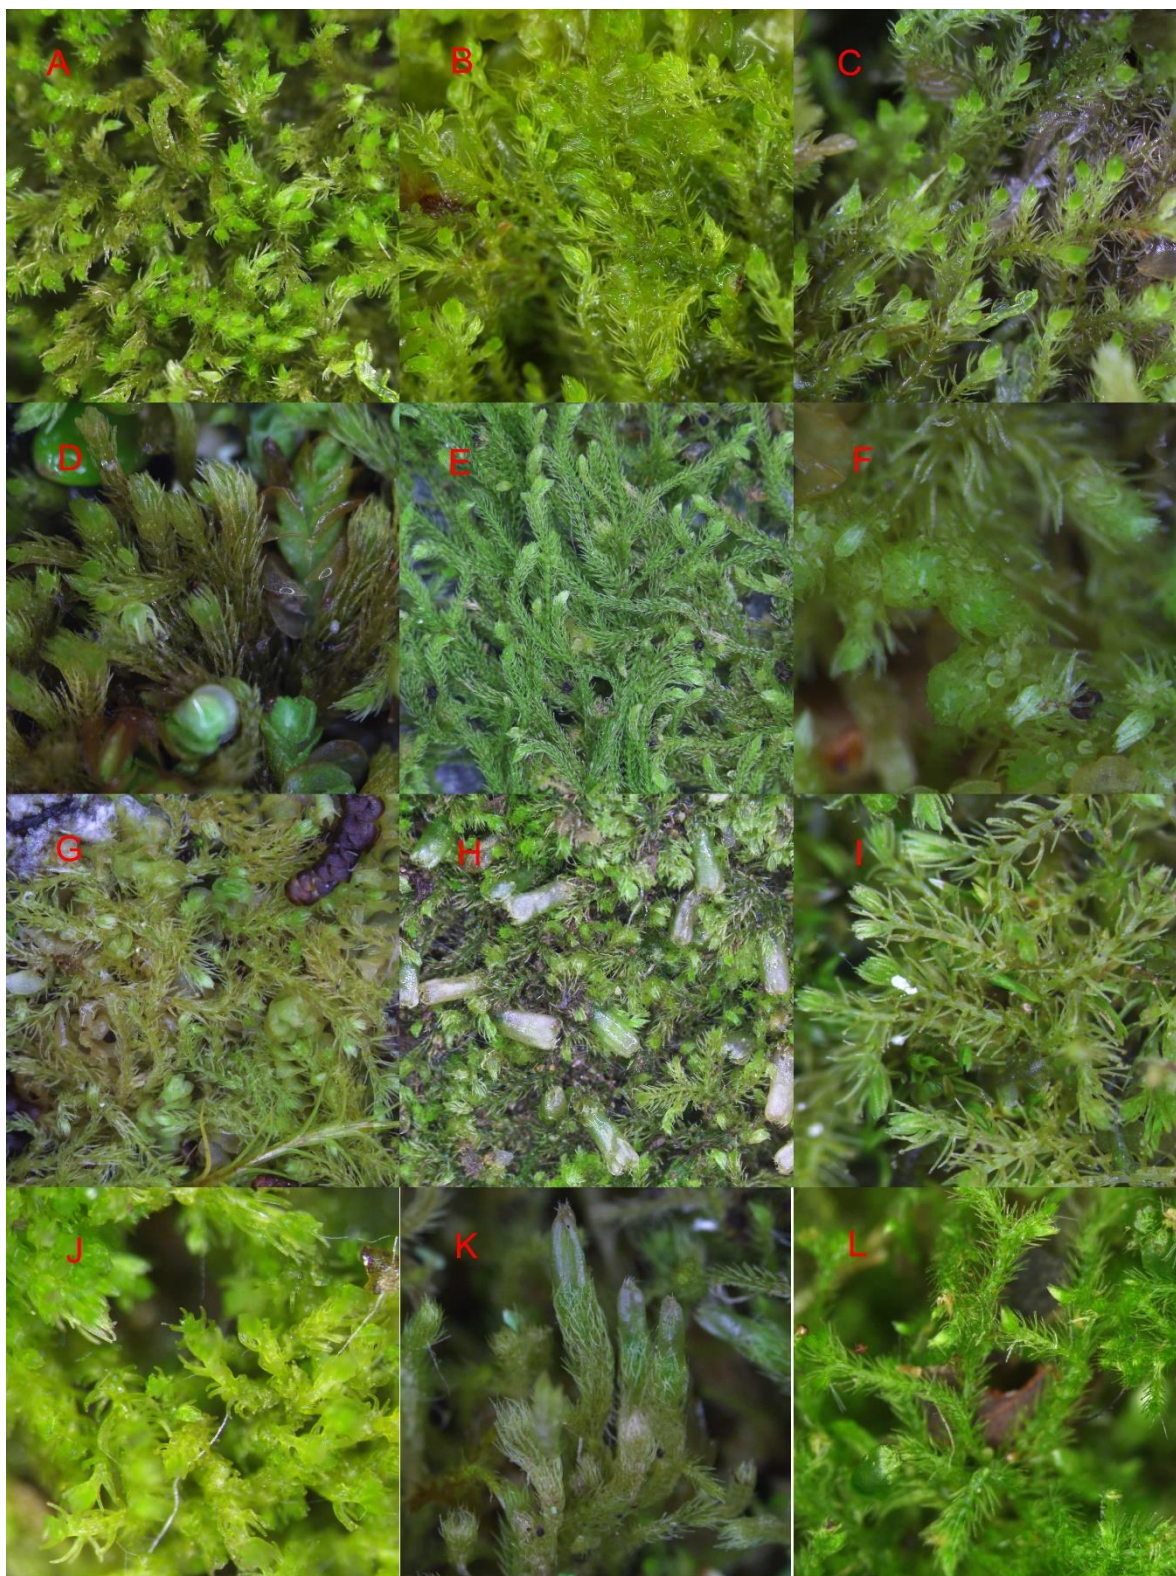

**Figure 1.** (A) *Blepharostoma prima* (Kh-47-28-19, VBGI); (B–D) *B. brevirete* (B, C from Mur-34-14-15, D from K-50-11-15, all in VBGI); (E) *B. epilithica* (J-11-13-15); (F–H) *B. trichophyllum* (F from S-25-18-17, G from S-25-8-17, H from Kh-50-17-19, all in VBGI); (I, J) *B. trichophyllum* x hybrid1 (I from S-18-24-17, J from Kh-58-4-19); (K, L) *B. neglecta* (K from Prim-16-22-16, L from S-48-18-16, all in VBGI).



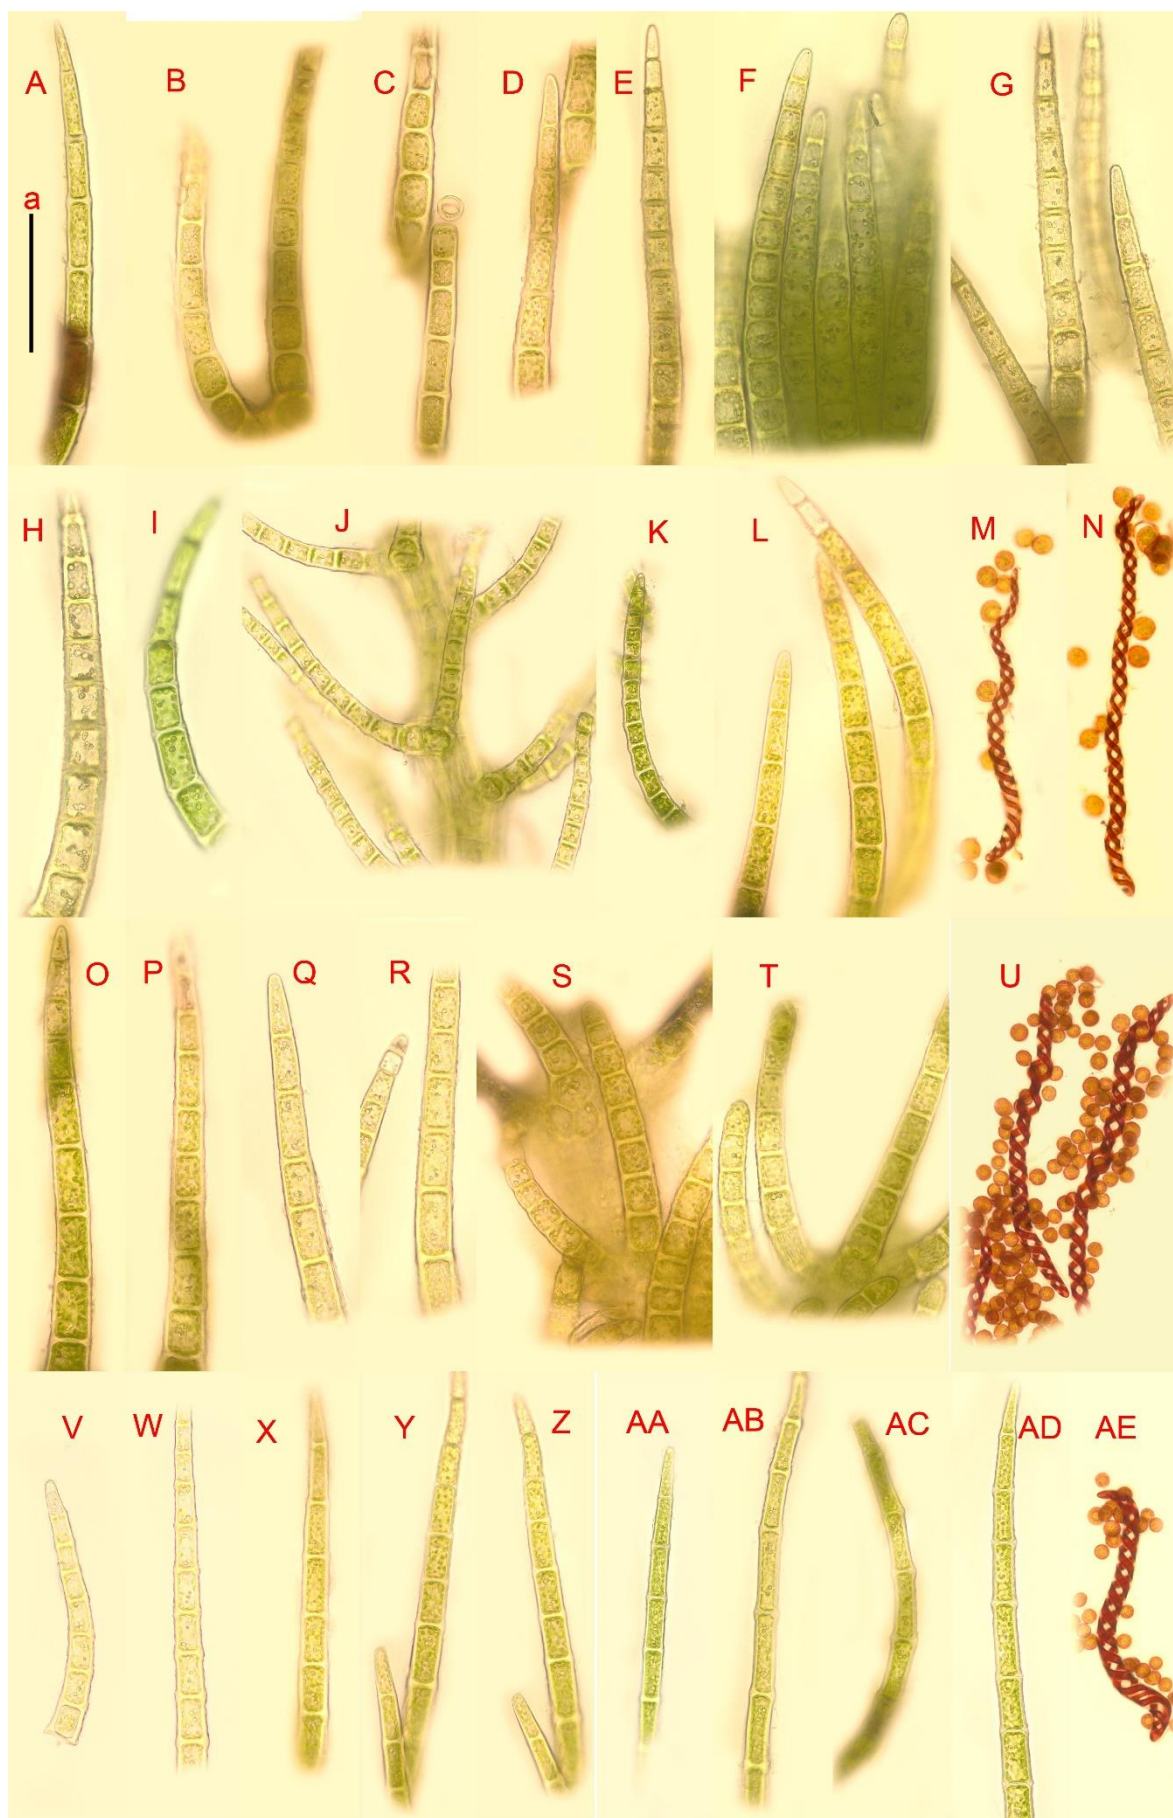

**Figure 2.** (A–D) *Blepharostoma prima* (A from S-45-12-16, B, C from Kh-47-28-19, D from S-14-17, all in VBGI); (E–H) *B. brevirete* (E, F from Mur-34-14-15, G, H – from K-50-11-15, all in VBGI); (I) *B. epixylica* (from J-11-13-15, VBGI); (J, K) *B. minor* (J from V-1-27-17, K from J-91-51-15, all in VBGI); (L–R) *B. trichophyllum* (L–N from Kh-46-12-19, O, P from Kh-50-17-19, Q, R from S-25-8-17, all in VBGI); (S, T) *B. trichophyllum x hybrid1* (from kh-58-4-19, VBGI); (U–AE) *B. neglecta* (U, AE from Kh-46-3-19, V, W from C-44-10-17, X–Z from Kh-46-3-19, AA from S-48-18-16, AB, AC from S-14-7-17, AD from Prim-16-22-16, all in VBGI). A–L, O–T, V–AD – leaf segments; M, N, U, AE – elaters and spores. Scale a – 100 µm.
